# Supplementary material for: Potential Distribution and the Risks of Bactericera cockerelli and Its Associated Plant Pathogen Candidatus Liberibacter Solanacearum for Global Potato Production
Source: MDPI journal article supplement (doi:10.3390/insects11050298), 2020-05-12
Supplement: s1 [file s1]

## Supplemental Materials

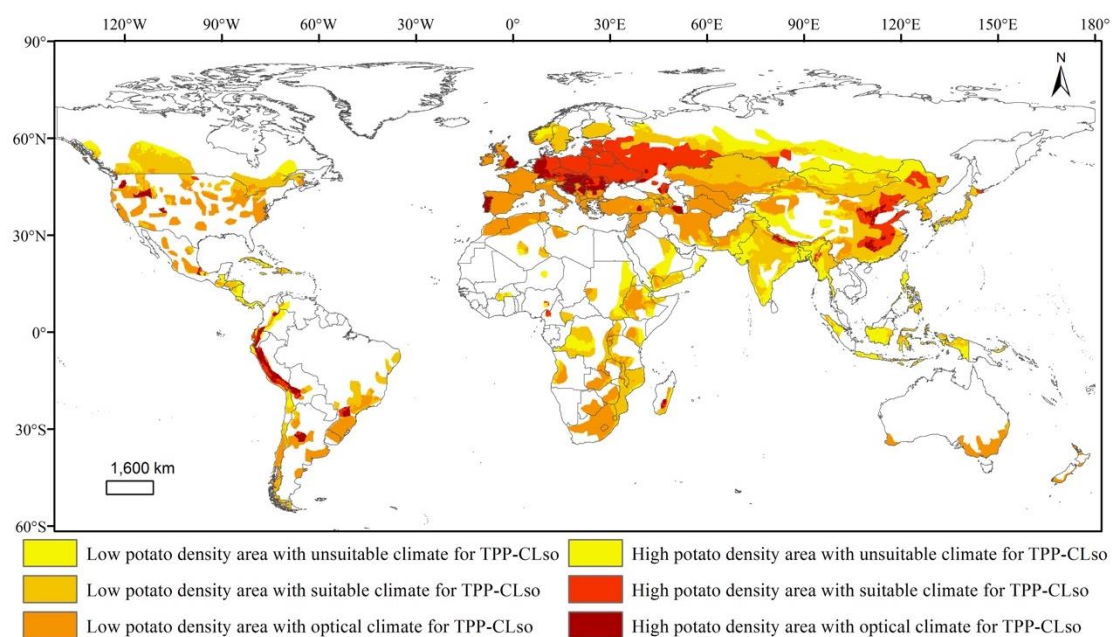

**Figure S1.** Overlap between global potato cultivation areas and predicted climatically suitable areas for TPP and CLso.
